1 **Symptomatic SARS-CoV-2 re-infection of a health care worker in a**  
2 **Belgian nosocomial outbreak despite primary neutralizing antibody**  
3 **response.**

4 Philippe SELHORST<sup>a,d,\*</sup>, Sabrina VAN IERSSEL<sup>g</sup>, Jo MICHIELS<sup>a</sup>, Joachim MARIËN<sup>b,d</sup>, Koen  
5 BARTHOLOMEEUSEN<sup>a</sup>, Eveline DIRINCK<sup>h</sup>, Sarah VANDAMME<sup>f</sup>, Hilde JANSENS<sup>e,f</sup>, Kevin  
6 K. ARIËN<sup>a,c</sup>

7  
8 **Affiliations:**

9 *<sup>a</sup> Department of Biomedical Sciences, Institute of Tropical Medicine, Antwerp, Belgium*

10 *<sup>b</sup> Department of Clinical Sciences, Institute of Tropical Medicine, Antwerp, Belgium*

11 *<sup>c</sup> University of Antwerp, Antwerp, Belgium*

12 *<sup>d</sup> The Outbreak Research Team, Institute of Tropical Medicine, Antwerp, Belgium*

13 *<sup>e</sup> Department of Infection Prevention, Antwerp University Hospital, Edegem, Belgium*

14 *<sup>f</sup> Department of Microbiology, Antwerp University Hospital, Edegem, Belgium*

15 *<sup>g</sup> Department of General Internal Medicine, Infectious diseases and Tropical Medicine, Antwerp  
16 University Hospital, Edegem, Belgium*

17 *<sup>h</sup> Department of Endocrinology, Diabetology and Metabolic Disease, Antwerp University  
18 Hospital, Edegem, Belgium*

19  
20 \*corresponding author

21 [pselhorst@itg.be](mailto:pselhorst@itg.be) +32(0)32476546 Nationalestraat 155 2000 Antwerpen BELGIUM

22

## 23 **Abstract**

24 **Background.** It is currently unclear whether SARS-CoV-2 re-infection will remain a rare event,  
25 only occurring in individuals who fail to mount an effective immune response, or whether it will  
26 occur more frequently when humoral immunity wanes following primary infection.

27 **Methods.** A case of re-infection was observed in a Belgian nosocomial outbreak involving 3  
28 patients and 2 health care workers. To distinguish re-infection from persistent infection and  
29 detect potential transmission clusters, whole genome sequencing was performed on  
30 nasopharyngeal swabs of all individuals including the re-infection case's first episode. IgA, IgM,  
31 and IgG and neutralizing antibody responses were quantified in serum of all individuals, and  
32 viral infectiousness was measured in the swabs of the reinfection case.

33 **Results.** Re-infection was confirmed in a young, immunocompetent health care worker as viral  
34 genomes derived from the first and second episode belonged to different SARS-CoV-2 clades.  
35 The symptomatic re-infection occurred after an interval of 185 days, despite the development of  
36 an effective humoral immune response following symptomatic primary infection. The second  
37 episode, however, was milder and characterized by a fast rise in serum IgG and neutralizing  
38 antibodies. Although contact tracing and virus culture remained inconclusive, the health care  
39 worker formed a transmission cluster with 3 patients and showed evidence of virus replication  
40 but not of neutralizing antibodies in her nasopharyngeal swabs.

41 **Conclusion** If this case is representative of most Covid-19 patients, long-lived protective  
42 immunity against SARS-CoV-2 might not be likely.

## 43 **Keywords**

44 SARS-CoV-2, re-infection, humoral immunity, coronavirus, COVID-19, whole genome  
45 sequencing

## 46 **Introduction**

47 The mechanism, extent, and duration by which primary SARS-CoV-2 infection provides  
48 immunity against re-infection are currently unclear. For common cold coronaviruses, loss of  
49 immunity and re-infection with the same virus have been reported to occur frequently 12 months  
50 after primary infection [1]. For SARS-CoV-2, persistent viral shedding can occur over prolonged  
51 periods of time following clinical recovery [2]. To confirm genuine re-infection, whole-genome  
52 sequencing is required. Since the start of the SARS-CoV-2 pandemic 11 months ago, only 8  
53 published and confirmed cases of re-infection were reported in Hong Kong [3], the USA [4,5],  
54 Belgium [6], the Netherlands [7], Ecuador [8], and India [9]. These cases likely are an  
55 underestimate due to the limited detection of asymptomatic cases. In fact many more cases were  
56 reported in the media and on preprint servers [2,10–12]. Hence, it remains to be seen whether  
57 these re-infection cases represent the tail end of the distribution with many more to come or  
58 whether SARS-CoV-2 re-infection remains a rare event.

59 One hypothesis could be that re-infections occurs as a result of immune evasion by another  
60 variant of SARS-CoV-2. However, the genomic variations seen across SARS-CoV-2 sequences  
61 are limited and likely the result of neutral evolution, rather than adaptive selection, and although  
62 the D614G mutation in Spike has become consensus, there is no evidence that this mutation is  
63 linked to host immune pressure [13,14].

64 Another hypothesis could be that these re-infections only occur in individuals that do not develop  
65 an effective immune response during primary infection. Indeed, not all Covid-19 patients  
66 seroconvert [15,16] and not all who seroconvert develop neutralizing antibodies [17].  
67 Furthermore, disease severity seems to correlate with higher IgG [18–20] and neutralizing  
68 antibody titers [19,20]. Unfortunately, in only two of all reported re-infection cases antibody

69 testing was reported after the first episode. In the Hong Kong case, IgGs but no neutralizing  
70 antibodies were detected 10 and 43 days pso [3,21] whereas in the Ecuador case, IgMs but no  
71 IgGs were detected by rapid test 4 days pso [8]. Neutralizing antibodies were not measured.  
72 Hence, it is currently unclear whether these re-infection cases were able to mount an effective  
73 immune response after primary infection.

74 Finally, it is not known whether immunity prevents onward transmission from those who are re-  
75 infected. Most reported re-infection cases [3,4,6-8,11] showed nasopharyngeal samples with  
76 high RT-qPCR Ct values, from which virus is usually unculturable. Five Indian health care  
77 workers however, displayed high viral loads during their secondary infection but no viral culture  
78 was performed to determine the infectiousness of their virus [9,12].

79 Here we describe a case of symptomatic re-infection in a health care worker despite having  
80 developed a neutralizing antibody response following symptomatic primary infection. The re-  
81 infection occurred with an interval of 185 days during a nosocomial outbreak involving 5  
82 individuals. Whole genome sequencing was performed, and humoral immune responses and viral  
83 infectiousness were quantified.

84

85

86

87

## 88 **Materials & Methods**

### 89 *Sample collection and diagnosis*

90 Sample collection and clinical evaluation were performed in view of diagnosis and standard of  
91 care and approved by the hospital's ethical committee (EC/PM/nvb/2020.084). Oral consent was  
92 obtained from all patients before sampling followed by written consent prior to publication.  
93 Initial SARS-CoV-2 diagnosis was performed at the hospital on nasopharyngeal swabs using the  
94 Xpert Xpress SARS-CoV-2 test on the GeneXpert® Platform (Cepheid, USA) as per  
95 manufacturer's instructions or by in-house PCR [22] with extraction on NucliSens EasyMag®  
96 (Biomérieux, France) and amplification on Cobas LightCycler® (Roche, Switzerland). Complete  
97 blood counts were performed on XN-9100® (Sysmex) and biochemistry parameters on  
98 Atellica® (Siemens, Germany).

99

### 100 *RNA extraction and RT-qPCR on nasopharyngeal samples*

101 At the Institute of Tropical Medicine Antwerp, RNA was extracted from UTM or eSwab  
102 medium after inactivation at 56°C with proteinase K using a Maxwell RSC Instrument. RNA  
103 from phocine distemper virus was added to all samples as an internal extraction and PCR  
104 inhibition control [23]. A SARS-CoV-2-specific RT-qPCR was then performed to amplify a 112  
105 bp fragment of the E gene as previously described [22] with 5 µL RNA in a 25 µL reaction using  
106 the Bioline SensiFAST mix, Reverse Transcriptase and RiboSafe RNase inhibitor. To determine  
107 the presence of SARS-CoV-2 replicase activity, a negative strand RT-qPCR was performed as  
108 previously described [24] with FWD-Tag-primer-1 (catacgcacggataaa-  
109 GCAAGAGATGGTTGTGTTC), Tag-primer-1 (catacgcacggataaa), REV-primer-1

110 (GTAAATGTTGTACCATCACACG) and FAM-labeled negative-strand-probe-1  
111 (CAGCAGCCAAACTAATGGTTGTCATA).

### 112 *Whole genome sequencing using MinION*

113 Whole genome sequencing was performed on an Oxford Nanopore MinION device using R9.4  
114 flow cells (Oxford Nanopore Technologies, UK) after a multiplex PCR with an 800bp SARS-  
115 CoV-2 primer scheme as previously described [25]. Sequence reads were basecalled in high  
116 accuracy mode and demultiplexed using the Guppy algorithm v3.6. Reads were aligned to the  
117 reference genome Wuhan-Hu-1 (MN908947.3) with Burrows-Wheeler Aligner (BWA-MEM)  
118 and a majority rule consensus was produced for positions with  $\geq 100x$  genome coverage, while  
119 regions with lower coverage, were masked with N characters.

120

### 121 *Phylogenomic analysis*

122 All SARS-CoV-2 genomes were compared at the nucleotide and amino acid level to the  
123 reference genome Wuhan-Hu-1. Clade assignment was performed using NextClade v0.7.2 [26].  
124 BLAST+ was used to extract the top 15 matches for each of our sequences from the  
125 msa\_0929.fasta file downloaded from GISAID (Global Initiative on Sharing All Influenza Data).  
126 In addition, we included the most recent (Aug 16-31, 2020) Belgian sequences and all Belgian L,  
127 O, V clade sequences collected between March 1-16, 2020. Sequence alignment was performed  
128 using MAFFT v7 and a maximum likelihood phylogenetic tree was inferred with IQ-TREE  
129 v1.6.12., using the TIM2+F+I model and 500 nonparametric bootstraps, and visualized in  
130 FigTree v1.4.4.

131

### 132 *SARS-CoV-2 specific antibody detection tests*

133 The Elecsys electrochemiluminescence immunoassay on the Cobas 8000® analyzer (Roche  
134 Diagnostics, Belgium) was used for the qualitative detection of total antibodies against the  
135 Nucleocapsid (N) antigen of SARS-CoV-2. A signal threshold  $\geq 1$  was defined as positive. For  
136 the separate quantification of IgM, IgG, and IgA antibodies, we used a Luminex bead-based  
137 assay [27]. In short, recombinant receptor binding domain (RBD) and N protein  
138 (BIOCONNECT, The Netherlands) were coupled to  $1.25 \times 10^6$  paramagnetic MAGPLEX COOH-  
139 microspheres from Luminex Corporation (Texas, USA). After incubation of beads and diluted  
140 sera (1/300 for IgG and IgM, 1/100 for IgA), a biotin-labeled anti-human IgG, IgA, and IgM  
141 (1:125) and streptavidin-R-phycoerythrin (1:1000) conjugate was added. Beads were read using  
142 a Luminex® 100/200 analyzer with 50  $\mu$ L acquisition, DD gat 5000 - 25000 settings, and high  
143 PMT option. Results were expressed as crude median fluorescent intensities (MFI). Samples  
144 were considered positive if  $MFI > 3 \times SD + \text{mean of negative controls}$  (n=16).

145

#### 146 ***SARS-CoV-2 viral neutralization test and virus isolation***

147 Serial dilutions (1/50 - 1/1600) of heat-inactivated (30 min at 56°C) serum or nasopharyngeal  
148 samples were incubated with 3x TCID<sub>50</sub> of a SARS-CoV-2 primary isolate (2019-nCoV-Italy-  
149 INMI1) for 1h at 37°C / 7% CO<sub>2</sub> and subsequently added to 18.000 Vero cells per well for a  
150 further 5 days incubation. Assay medium consisted of EMEM (Lonza, Belgium) supplemented  
151 with 2 mM L-glutamine, 2% fetal bovine serum, and penicillin - streptomycin (Lonza). After  
152 incubation, cytopathic effect caused by viral growth was scored microscopically. 50% (NT50) or  
153 90% (NT90) neutralization titers were calculated using the Reed-Muench method. Similarly,  
154 virus isolation was attempted by incubating a serial dilution of nasopharyngeal samples on

155 VeroE6-TMPRSS2 cells after 2 hours of spinoculation at 2500g and 25°C and following up  
156 cytopathic effect.

157



## 158 **Results**

### 159 **Clinical evolution of the outbreak**

160 In September 2020, a nosocomial outbreak occurred at an internal medicine ward in a Belgian  
161 hospital. A man in his seventies (PAT1) developed influenza-like symptoms of cough, low grade  
162 fever and general malaise and tested positive for SARS-CoV-2. Three days later a woman, also  
163 in her seventies, (PAT2) tested positive after developing gastro-intestinal symptoms and general  
164 malaise (Table 1). In response to this outbreak all patients and health care workers on the ward  
165 were tested revealing 1 additional asymptomatic man in his eighties (PAT3) and 2 infected  
166 health care workers (HCW1 & HCW2) showing mild symptoms. All individuals recovered  
167 completely. HCW1, a woman in her thirties, had already been infected with SARS-CoV-2 in  
168 March 2020. During this first episode she had a protracted mild illness with cough, dyspnea,  
169 headache, fever and general malaise. Her hematological and biochemical parameters were  
170 consistent with viral infection showing decreased white blood cell counts and mildly elevated  
171 CRP (Supplementary table 1). She was managed as an outpatient and slowly resumed work after  
172 1 month. During the second episode her clinical presentation was milder, and she resumed work  
173 10 days after diagnosis although she experienced dyspneic spells for up to 3 weeks. A blood  
174 sample and a second swab were taken 7 days after symptom onset. This time no laboratory  
175 abnormalities were found (Supplementary table 1).

176

### 177 **Whole genome sequencing revealing transmission cluster**

178 To distinguish re-infection from persistent infection and detect potential transmission clusters,  
179 whole genome sequencing was performed on all nasopharyngeal swabs taken from the 3 patients  
180 and 2 health care workers, including the swab taken from HCW1 during her first episode. 99.6%

181 of the SARS-CoV-2 genome (nucleotide 55–29823) was recovered at an average mean depth of  
182 771-fold (Supplementary table 2). Analysis of these sequences (EPI\_ISL\_582127–32) revealed  
183 that the virus which infected HCW1 in September belonged to a different SARS-CoV-2 clade (G  
184 clade) than the virus causing her first COVID-19 episode in March (V clade) (Figure 1). A total  
185 of 18 nucleotide differences, of which only one shared (i.e. G11083T defining the V clade from  
186 which clade G emerged), could be observed between the 2 strains (Figure 2). This confirms their  
187 distinct nature and is within the range of 9-24 nucleotide differences reported for other re-  
188 infections. Interestingly, the 3 infected patients shared the same virus and hence constitute a  
189 recent transmission cluster with HCW1. None of the amino acid mutations in the S gene of the  
190 reinfecting virus were previously reported to confer resistance to convalescent plasma or RBD-  
191 specific monoclonal antibodies [28]. Finally, the viral sequence derived from HCW2 differed by  
192 27 nucleotides from HCW1’s virus and belonged to GISAID’s GH clade (Figure 1 and 2). This  
193 suggests that HCW2 was infected by an external transmission source which corresponds with the  
194 fact that one of her relatives also tested positive for SARS-CoV-2. As the phylogenetic analysis  
195 and visualization provided by Nextstrain [29] only uses a subsample of publicly available SARS-  
196 CoV-2 genomes, we performed a blast search to include the most closely related known  
197 sequences in our analysis. As expected, the genomes from HCW1, PAT13, and HCW2 in  
198 September were closely related to Belgian sequences obtained in July-September whereas the  
199 virus from HCW1’s March episode was identical to Belgian sequences collected in that same  
200 month (Supplementary figure 1).

201

202

203

## 204 **Assessment of SARS-CoV-2 specific humoral response and neutralizing antibodies**

205 We then measured the presence of total SARS-CoV-2 specific antibodies as well as individual  
206 IgA, IgM, and IgG titers in the serum of the 4 individuals in the transmission cluster using all  
207 available samples. As antibody kinetics can depend on the antigen [20], we measured responses  
208 against the N protein and the RBD of the Spike protein. In addition, we performed *in vitro* viral  
209 neutralization tests on serum and swab samples to determine whether these antibodies have  
210 neutralizing capacity. HCW1 clearly seroconverted because 3 months after primary infection,  
211 she still displayed high serum IgG titers as well as neutralizing antibodies (200 NT50) at levels  
212 higher than those of the 3 patients 2 weeks post diagnosis (Table 1). As expected, serum IgM and  
213 IgA could not be detected at this timepoint. Since antibody testing was not available during the  
214 first wave of the pandemic in Belgium, and no baseline sample was taken upon re-infection, we  
215 could not evaluate whether her neutralization titers had been higher closer to primary infection or  
216 disappeared closer to re-infection. However, during re-infection, a rapid rise in neutralizing  
217 antibodies could be observed within 7 days pso (1309 NT50) which further increased 14 days  
218 later (>1600 NT50) in line with the high IgG titers and somewhat lower IgA and IgM titers at  
219 these timepoints (Table 1). PAT2 showed full seroconversion 13 days post symptom onset (pso)  
220 and displayed high IgA, IgM and IgG titers as well as a low neutralizing antibody response (75  
221 NT50). For PAT1 however, who was first to develop symptoms, IgM levels were below the cut-  
222 off 17 days pso although IgA and IgG were clearly present as well as neutralizing antibodies  
223 (100 NT50). Finally, for PAT3 only low IgA titers and very low levels of neutralizing antibodies  
224 (<50 NT50) were detected 12 days post diagnosis which corresponds with his asymptomatic  
225 disease and high Ct values upon diagnosis (Table 1). No neutralizing antibodies were detected in  
226 any of the nasopharyngeal swabs including those of HCW1 taken at day 0 and day 7 pso.

227 **Potential onward transmission from the re-infection case**

228 How transmission exactly occurred within this cluster of 4 individuals as well as its origin  
229 remain unclear. The identical genomes and timelines would suggest one index patient who  
230 infected the others. All 3 patients tested negative for SARS-CoV-2 upon admission to the  
231 hospital with a diabetic foot problem 4 to 6 weeks prior to this outbreak (Table 1). They were put  
232 on compulsory bed rest, stayed in private rooms, and only received a maximum of 1 visitor a day  
233 as per hospital rules. It is unlikely that HCW1 contracted the virus and transmitted it to the 3  
234 patients as HCW1 developed symptoms 4 days after PAT1 and did not nurse PAT1. One  
235 explanation could be that an asymptomatic visitor of PAT1 infected both PAT1 and HCW1 who  
236 then transmitted the virus while nursing PAT2 and PAT3. However, none of the close contacts of  
237 HCW1, PAT1, and PAT3 tested positive for SARS-CoV-2, although cases could have been  
238 missed. PAT2 reported symptomatic SARS-CoV-2 infection in one of her relatives 2 days after  
239 her diagnosis, but is unlikely to be the index patient (and rather infected the visitor) as PAT2  
240 developed symptoms 3 days after PAT1 who she did not have contact with. Finally,  
241 nasopharyngeal swabs taken from HCW1 at diagnosis and 6 days later showed high viral loads  
242 (Avg Ct 19 and 25 respectively), but lower than at diagnosis of primary infection (Avg Ct 13),  
243 and contained replicating virus as indicated by RT-qPCR for negative strand RNA (Avg Ct 25.5  
244 and 28.5 respectively). Yet, we were unable to culture virus from these swabs, but this might be  
245 because we had to dilute the otherwise cytotoxic swab medium to a level where virus isolation  
246 can fail.

247

## 248 **Discussion**

249 One of the key questions in understanding SARS-CoV-2 immunity and predicting the course of  
250 the pandemic is for how long and how frequently primary infection protects against re-infection.  
251 Eight cases of re-infection have now been described showing intervals between episodes from 48  
252 to 142 days. In this study, we describe another genuine case of SARS-CoV-2 re-infection with an  
253 interval of 185 days. The viral genomes from the first and second episode belonged to different  
254 SARS-CoV-2 clades and phylogenomic analysis showed that the closest relatives to these 2  
255 genomes were strains collected mostly from Belgium around the same period.

256 We then quantified the humoral immune response in HCW1 after her first and second SARS-  
257 CoV-2 episode as it was suggested that asymptomatic and mild primary infections might not  
258 protect against re-infection. The fact that HCW1 fully seroconverted and even had significant  
259 levels of serum neutralizing antibodies 3 months after primary infection, suggests that she wasn't  
260 an exceptional patient unable to mount a humoral immune response. The re-infecting virus also  
261 didn't harbor any known Spike mutations that could have enabled escape from neutralizing  
262 antibodies induced during primary infection. The durability of the humoral immune response on  
263 the other hand, remains a debated issue. Although some early studies reported a rapid loss of  
264 humoral immunity [14,30] within 2-3 months in up to 40% of patients with mild disease [18],  
265 more recent evidence shows that neutralizing antibodies and IgGs actually reach a stable nadir  
266 after an initial decline [20,31], which persists for at least 5 to 7 months, presumably as short-  
267 lived plasma cells are replaced with long-lived antibody secreting cells [20]. However, as no  
268 blood sample was taken from HCW1 right before or at day 0 of the second episode, we could not  
269 reliably determine whether neutralizing antibodies persisted or whether a further loss allowed for

270 the re-infection. Of note, neutralizing antibodies are only a marker of immunity and the antibody  
271 level needed to confer protection to SARS-CoV-2 is currently unknown.

272 The slightly milder clinical disease course of HCW1's secondary infection with normal  
273 physiological parameters, is likely the result of the patient's adaptive immunity being primed by  
274 the first infection. This corresponds with the lower viral loads and the strong and fast rise in  
275 serum IgG, and neutralizing antibody responses observed after re-infection while IgA and IgM  
276 levels remained rather low. Unfortunately, we were unable to compare these antibody levels to  
277 similar time points after the first episode.

278 It seems likely that HCW1 played a role in the spread of this outbreak as she provides the only  
279 link between some of the patients. Furthermore, although virus culture remained inconclusive,  
280 HCW1's nasopharyngeal swabs contained replicating virus but no neutralizing antibodies which  
281 suggests the re-infecting virus was fully capable of onward transmission. However, none of her  
282 contacts tested positive, which might be reassuring.

283 In conclusion, we describe a case of SARS-CoV-2 re-infection in a young, immunocompetent  
284 patient who, in contrast to the Hong Kong case, developed an effective humoral response after  
285 primary infection. If cases like this substantially increase over the next few months, long-lived  
286 protective immunity against SARS-CoV-2 will not be likely, which would be in line with other  
287 human coronaviruses, and might impact current vaccine development strategies which are based  
288 on eliciting neutralizing antibody responses.

289

290

291 **Acknowledgements**

292 PS and JM are members of the Institute of Tropical Medicine's Outbreak Research Team which  
293 is financially supported by the Department of Economy, Science and Innovation (EWI) of the  
294 Flemish government. Part of the research was covered by the Flemish Research Foundation  
295 [grant number FWO-G0G4220N to KA]. We thank Odin Goovaerts and Wim Adriaensen for  
296 carefully reading the manuscript as well as all sequence contributors to the GISAID database.

297

## 298 **References**

- 299 1. Edridge AWD, Kaczorowska J, Hoste ACR, et al. Seasonal coronavirus protective  
300 immunity is short-lasting. *Nat Med* **2020**;
- 301 2. Raddad LJA, Chemaitelly H, Malek JA, et al. Assessment of the risk of SARS-CoV-2  
302 reinfection in an intense re-exposure setting. *medRxiv* **2020**;
- 303 3. To KK-W, Hung IF-N, Ip JD, et al. COVID-19 re-infection by a phylogenetically distinct  
304 SARS-coronavirus-2 strain confirmed by whole genome sequencing. *Clin Infect Dis* **2020**;
- 305 4. Tillett RL, Sevinsky JR, Hartley PD, et al. Genomic evidence for reinfection with SARS-  
306 CoV-2: a case study. *Lancet Infect Dis* **2020**;
- 307 5. Larson D, Brodniak SL, Voegtly LJ, et al. A case of early re-infection with SARS-CoV-2.  
308 *Clin Infect Dis* **2020**; ciaa1436.
- 309 6. Van Elslande J, Vermeersch P, Vandervoort K, et al. Symptomatic SARS-CoV-2  
310 reinfection by a phylogenetically distinct strain. *Clin Infect Dis* **2020**; ciaa1330.
- 311 7. Mulder M, van der Vegt DSJM, Oude Munnink BB, et al. Reinfection of SARS-CoV-2 in  
312 an immunocompromised patient: a case report. *Clin Infect Dis* **2020**; ciaa1538.
- 313 8. Prado-Vivar B, Becerra-Wong M, Guadalupe JJ, et al. COVID-19 Re-infection by a  
314 phylogenetically distinct SARS-CoV-2 variant, first confirmed event in South America.  
315 *SSRN Electron J* **2020**;
- 316 9. Gupta V, Bhojar RC, Jain A, et al. Asymptomatic reinfection in two healthcare workers  
317 from India with genetically distinct SARS-CoV-2. *Clin Infect Dis* **2020**; ciaa1451.
- 318 10. BNO. Covid-19 reinfection tracker. 2020. Available at:  
319 <https://bnonews.com/index.php/2020/08/covid-19-reinfection-tracker/>. Accessed 27  
320 October 2020.



- 321 11. Goldman JD, Wang K, Roltgen K, et al. Reinfection with SARS-CoV-2 and failure of  
322 humoral immunity: a case report. *medRxiv* **2020**;
- 323 12. Shastri J, Parikh S, Agarwal S, et al. Whole genome sequencing confirmed SARS-CoV-2  
324 reinfections among healthcare workers in India with increased severity in the second  
325 episode. *SSRN Electron J* **2020**;
- 326 13. Dearlove B, Lewitus E, Bai H, et al. A SARS-CoV-2 vaccine candidate would likely  
327 match all currently circulating variants. *Proc Natl Acad Sci U S A* **2020**; 117:23652–  
328 23662.
- 329 14. Beaudoin-Bussièrès G, Laumaea A, Anand SP, et al. Decline of humoral responses against  
330 SARS-CoV-2 spike in convalescent individuals. *MBio* **2020**; 11.
- 331 15. Fill Malfertheiner S, Brandstetter S, Roth S, et al. Immune response to SARS-CoV-2 in  
332 health care workers following a COVID-19 outbreak: a prospective longitudinal study. *J*  
333 *Clin Virol* **2020**; 130:104575.
- 334 16. Pollán M, Pérez-Gómez B, Pastor-Barriuso R, et al. Prevalence of SARS-CoV-2 in Spain  
335 (ENE-COVID): a nationwide, population-based seroepidemiological study. *Lancet* **2020**;  
336 396:535–544.
- 337 17. Robbiani DF, Gaebler C, Muecksch F, et al. Convergent antibody responses to SARS-  
338 CoV-2 in convalescent individuals. *Nature* **2020**; 584:437–442.
- 339 18. Long QX, Tang XJ, Shi QL, et al. Clinical and immunological assessment of  
340 asymptomatic SARS-CoV-2 infections. *Nat Med* **2020**; 26:1200–1204.
- 341 19. Ko J-H, Joo E-J, Park S-J, et al. Neutralizing antibody production in asymptomatic and  
342 mild COVID-19 patients, in comparison with pneumonic COVID-19 patients. *J Clin Med*  
343 **2020**; 9:2268.

- 344 20. Ripperger TJ, Uhrlaub JL, Watanabe M, et al. Orthogonal SARS-CoV-2 serological  
345 assays enable surveillance of low prevalence communities and reveal durable humoral  
346 immunity. *Immunity* **2020**;
- 347 21. Chan PKS, Lui G, Hachim A, et al. Serologic responses in healthy adult with SARS-CoV-  
348 2 reinfection, Hong Kong, August 2020. *Emerg Infect Dis* **2020**; 26.
- 349 22. Corman VM, Landt O, Kaiser M, et al. Detection of 2019 novel coronavirus (2019-nCoV)  
350 by real-time RT-PCR. *Eurosurveillance* **2020**; 25:2000045.
- 351 23. Clancy A, Crowley B, Niesters H, Herra C. The development of a qualitative real-time  
352 RT-PCR assay for the detection of hepatitis C virus. *Eur J Clin Microbiol Infect Dis* **2008**;  
353 27:1177.
- 354 24. Huits R, De Smet B, Grard G, et al. Detection of Zika virus replication in human semen  
355 by reverse-transcription polymerase chain reaction targeting of antisense ribonucleic acid.  
356 *J Infect Dis* **2020**; 222:319–323.
- 357 25. Pirnay JP, Selhorst P, Cochez C, et al. Study of a SARS-CoV-2 outbreak in a Belgian  
358 military education and training center in Maradi, Niger. *Viruses* **2020**; 12:949.
- 359 26. NextClade v0.7.2. Available at: <https://clades.nextstrain.org/>.
- 360 27. Ayouba A, Thaurignac G, Morquin D, et al. Multiplex detection and dynamics of IgG  
361 antibodies to SARS-CoV2 and the highly pathogenic human coronaviruses SARS-CoV  
362 and MERS-CoV. *J Clin Virol* **2020**; 129:104521.
- 363 28. Weisblum Y, Schmidt F, Zhang F, et al. Escape from neutralizing antibodies by SARS-  
364 CoV-2 spike protein variants. *bioRxiv* **2020**;
- 365 29. Hadfield J, Megill C, Bell SM, et al. Nextstrain: real-time tracking of pathogen evolution.  
366 *Bioinformatics* **2018**; 34:4121–4123.

- 367 30. Ibarondo FJ, Fulcher JA, Goodman-Meza D, et al. Rapid decay of anti-SARS-CoV-2  
368 antibodies in persons with mild Covid-19. *N. Engl. J. Med.* 2020; 383:1085–1087.
- 369 31. Isho B, Abe KT, Zuo M, et al. Persistence of serum and saliva antibody responses to  
370 SARS-CoV-2 spike antigens in COVID-19 patients. *Sci Immunol* **2020**; 5:eabe5511.
- 371

## 372 **Figure Captions**

373 **Figure 1. SARS-CoV-2 clade assignment of 6 genomes recovered from 3 patients (PAT) and**  
374 **2 health care workers (HCW).** Sequences were aligned to a representation of the global SARS-  
375 CoV-2 genetic diversity using a banded Smith-Waterman algorithm with an affine 160 gap-  
376 penalty and subsequently visualized using NextClade v0.7.2. Colors represent the different  
377 GISAID clades. The 6 genomes and their clades are marked by respectively arrows and grey  
378 text. D = days post symptom onset / diagnosis; Mar = March; Sep = September

379  
380 **Figure 2. Nucleotide and amino acid comparison of the nosocomial SARS-CoV-2 genomes**  
381 **to the reference genome Wuhan-Hu-1.** \* Mutations defining GISAID's G clade; + Mutations  
382 defining GISAID's V clade; □ Mutation defining GISAID's GH clade, # Nt = number of  
383 nucleotide changes compared to Wuhan-Hu-1; # AA = number of amino acid changes compared  
384 to Wuhan-Hu-1; Clade = respectively Nextstrain (19A; 20A); GISAID (V; G; GH); and Pangolin  
385 (B.1; B.2) nomenclature; PAT = patient; HCW = health care worker; ORF = open reading frame;  
386 M = membrane; S = Spike; N = Nucleocapsid; D = days post symptom onset / diagnosis; Mar =  
387 March; Sep = September

388  
389 **Supplementary figure 1. Phylogenomic analysis of 6 genomes recovered from 3 patients**  
390 **(PAT) and 2 health care workers (HCW) within a panel of most closely related SARS-CoV-**  
391 **2 sequences.** A maximum likelihood phylogenetic tree (TIM2+F+I model) was inferred with IQ-  
392 TREE v1.6.12 using 500 nonparametric bootstraps and the -czb option to collapse near zero  
393 branch length and rooted using Wuhan-Hu-1 (MN908947.3) as outgroup. Leaf labels contain the  
394 country of origin, sequence name, GISAID accession ID, date, and region. The genomes of the

395 first and second infection of HCW1, patients, and HCW2 are depicted in respectively red, blue  
396 and green text. The scale bar represents the average number of nucleotide substitutions per site.

# Phylogeny

Clade ^

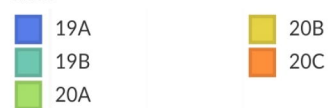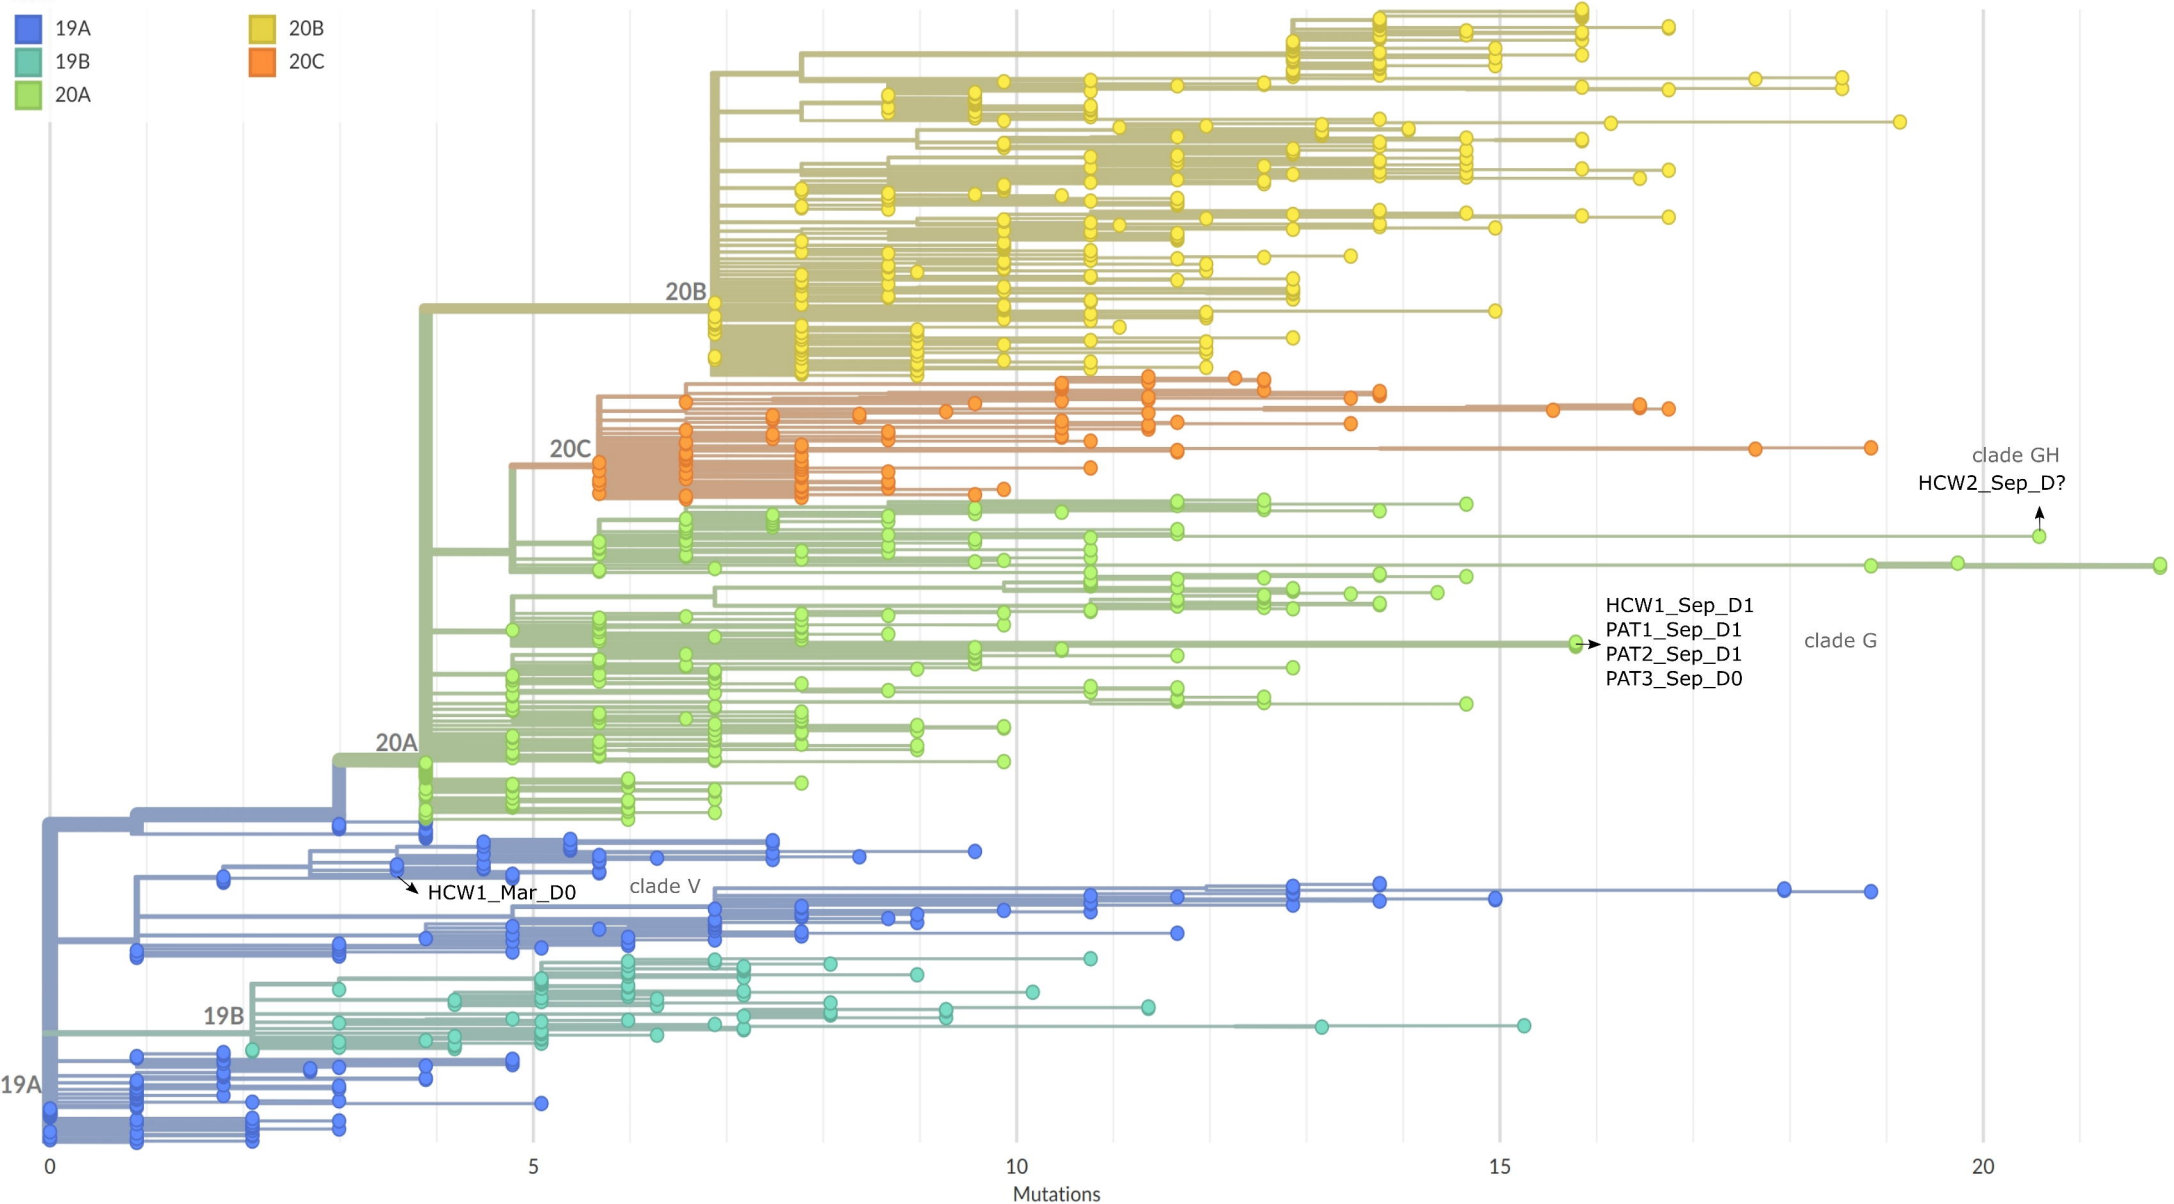

|                   |                  |     | ORF1a  |       |      |        |      |      |                     |      |                    | ORF1b |       |       |       |        |        |       | S     |       |        | ORF3a |                   |        |       |                    | M     |                    | N     |                    |       |       | ORF10 |       |       |       |       |  |
|-------------------|------------------|-----|--------|-------|------|--------|------|------|---------------------|------|--------------------|-------|-------|-------|-------|--------|--------|-------|-------|-------|--------|-------|-------------------|--------|-------|--------------------|-------|--------------------|-------|--------------------|-------|-------|-------|-------|-------|-------|-------|--|
| Sequence name     | Clade            | #Nt | 241*   | 3037* | 3602 | 4543   | 5629 | 6941 | 6968                | 9526 | 11083 <sup>+</sup> | 11497 | 13993 | 14408 | 14805 | 15324  | 15766  | 16889 | 17019 | 17247 | 18877  | 21855 | 22992             | 23403* | 25505 | 25563 <sup>†</sup> | 25710 | 25906              | 25996 | 26144 <sup>+</sup> | 26735 | 26876 | 28651 | 28869 | 28975 | 29399 | 29625 |  |
|                   |                  | #AA |        |       |      |        |      |      |                     |      |                    |       |       |       |       |        |        |       |       |       |        |       |                   |        |       |                    |       |                    |       |                    |       |       |       |       |       |       |       |  |
| HCW1 Mar D0 C5182 | 19A<br>V<br>B.2  | 4   |        |       |      |        |      |      |                     |      |                    |       |       |       |       |        |        |       |       |       |        |       |                   |        |       |                    |       |                    |       |                    |       |       |       |       |       |       |       |  |
|                   |                  | 2   | C      | C     | C    | C      | G    | C    | C                   | G    | T                  | C     | G     | C     | T     | C      | G      | A     | G     | C     | C      | C     | G                 | A      | A     | G                  | C     | G                  | G     | T                  | C     | T     | C     | C     | G     | G     | C     |  |
| HCW1 Sep D1 C5183 | 20A<br>G<br>B.1  | 16  | T      | T     | T    | C      | G    | T    | T                   | G    | T                  | C     | G     | T     | C     | T      | G      | A     | G     | T     | C      | T     | G                 | G      | G     | C                  | C     | T                  | G     | C                  | T     | T     | T     | G     | G     | T     |       |  |
| PAT1 Sep D1 C5184 |                  |     | T      | T     | T    | C      | G    | T    | T                   | G    | T                  | C     | G     | T     | C     | T      | G      | A     | G     | T     | C      | T     | G                 | G      | G     | C                  | C     | T                  | G     | C                  | T     | T     | T     | G     | G     | T     |       |  |
| PAT2 Sep D1 C5185 |                  | 10  | T      | T     | T    | C      | G    | T    | T                   | G    | T                  | C     | G     | T     | C     | T      | G      | A     | G     | T     | C      | T     | G                 | G      | G     | C                  | C     | T                  | G     | C                  | T     | T     | T     | G     | G     | T     |       |  |
| PAT3 Sep D0 C5186 |                  |     | T      | T     | T    | C      | G    | T    | T                   | G    | T                  | C     | G     | T     | C     | T      | G      | A     | G     | T     | C      | T     | G                 | G      | G     | G                  | C     | C                  | T     | G                  | C     | T     | T     | T     | G     | G     | T     |  |
| HCW2 Sep D? C5188 | 20A<br>GH<br>B.1 | 21  | T      | T     | C    | T      | T    | C    | C                   | T    | G                  | T     | T     | T     | C     | C      | T      | G     | T     | T     | T      | C     | A                 | G      | A     | T                  | T     | G                  | G     | G                  | T     | C     | C     | C     | C     | A     | T     |  |
|                   |                  | 12  | T      | T     | C    | T      | T    | C    | C                   | T    | G                  | T     | T     | T     | C     | C      | T      | G     | T     | T     | T      | C     | A                 | G      | A     | T                  | T     | G                  | G     | G                  | T     | C     | C     | C     | C     | A     | T     |  |
| Amino acid change |                  |     | H1113Y |       |      | M3087I |      |      | L3606F <sup>+</sup> |      |                    | A176S | P314L |       | V767L | K1141R | E1184D |       | S98F  | S477N | D614G* | Q38R  | Q57H <sup>†</sup> |        | G172R | V202L              |       | G251V <sup>+</sup> |       |                    | P199L | M234I | A376T | S23F  |       |       |       |  |

**Table 1. Epidemiological and serological data on the 3 patients and 2 health care workers involved in the nosocomial outbreak**

| Patient | Sex | Age   | Condition | COVID-19 contacts | Symptoms                          | Swab collection | Avg Ct | Swab NT50 | Serum collection    | Serum total Ig (COI) | Serum IgA (MFI) |              | Serum IgM (MFI) |            | Serum IgG (MFI) |             | Serum NT50 |
|---------|-----|-------|-----------|-------------------|-----------------------------------|-----------------|--------|-----------|---------------------|----------------------|-----------------|--------------|-----------------|------------|-----------------|-------------|------------|
|         |     |       |           |                   |                                   |                 |        |           |                     |                      | RBD             | N            | RBD             | N          | RBD             | N           |            |
| HCW1    | F   | 35-40 | Healthy   | None              | Cough; rhinitis; sore throat      | Mar D0          | 13     | Neg       | Jun D94             | 90.5                 | Neg             | Neg          | Neg             | Neg        | 12774           | 23259       | 200        |
|         |     |       |           |                   |                                   | Sep D1          | 19     | Neg       | Jun D105            | 102.0                | -               | -            | -               | -          | -               | -           | -          |
|         |     |       |           |                   |                                   | Sep D7          | 25     | Neg       | Sep D7              | 47.4                 | 2578            | 349          | 811             | 799        | 24170           | 26301       | 1309       |
|         |     |       |           |                   |                                   |                 |        |           | Sep D21             | 51.6                 | 2312            | Neg          | 952             | 714        | 24532           | 25862       | >1600      |
| PAT1    | M   | 75-80 | Diabetic  | None              | Cough; low fever; malaise         | Sep D1          | 14     | Neg       | Sep D17             | Neg                  | 2774            | 20522        | Neg             | Neg        | 2783            | 1882        | 100        |
| PAT2    | F   | 75-80 | Diabetic  | Relative          | Gastro-intestinal issues; malaise | Sep D1          | 21     | Neg       | Sep D-13<br>Sep D13 | Neg<br>Neg           | Neg<br>986      | Neg<br>18216 | Neg<br>4043     | Neg<br>535 | Neg<br>21274    | Neg<br>1016 | Neg<br>75  |
| PAT3    | M   | 85-90 | Diabetic  | None              | None                              | Sep D0          | 29     | Neg       | Sep D12             | Neg                  | 768             | 292          | Neg             | Neg        | Neg             | Neg         | <50        |
| HCW2    | F   | 25-30 | Healthy   | Relative          | ?                                 | Sep D?          | 30     | Neg       | n/d                 | n/d                  | n/d             | n/d          | n/d             | n/d        | n/d             | n/d         | n/d        |

HCW = health care worker; PAT = patient; F = female; M = male; n/a = not applicable; Avg Ct = average cycle threshold; NT50 = 50% neutralization antibody titer; Ig= immunoglobuline; RBD = receptor binding domain; MFI = median fluorescent intensity; COI = cutoff index, >1 = reactive; n/d = not done; Neg = negative; N = nucleoprotein; D = days post symptom onset / diagnosis; Mar = March; Sep = September; Jun = June
