# Supplementary material for: Symptomatic SARS-CoV-2 re-infection of a health care worker in a Belgian nosocomial outbreak despite primary neutralizing antibody response
Source: bioRxiv or medRxiv preprint supplement (doi:10.1101/2020.11.05.20225052), 2020-11-09
Supplement: Supplementary file [file media-1.pdf]

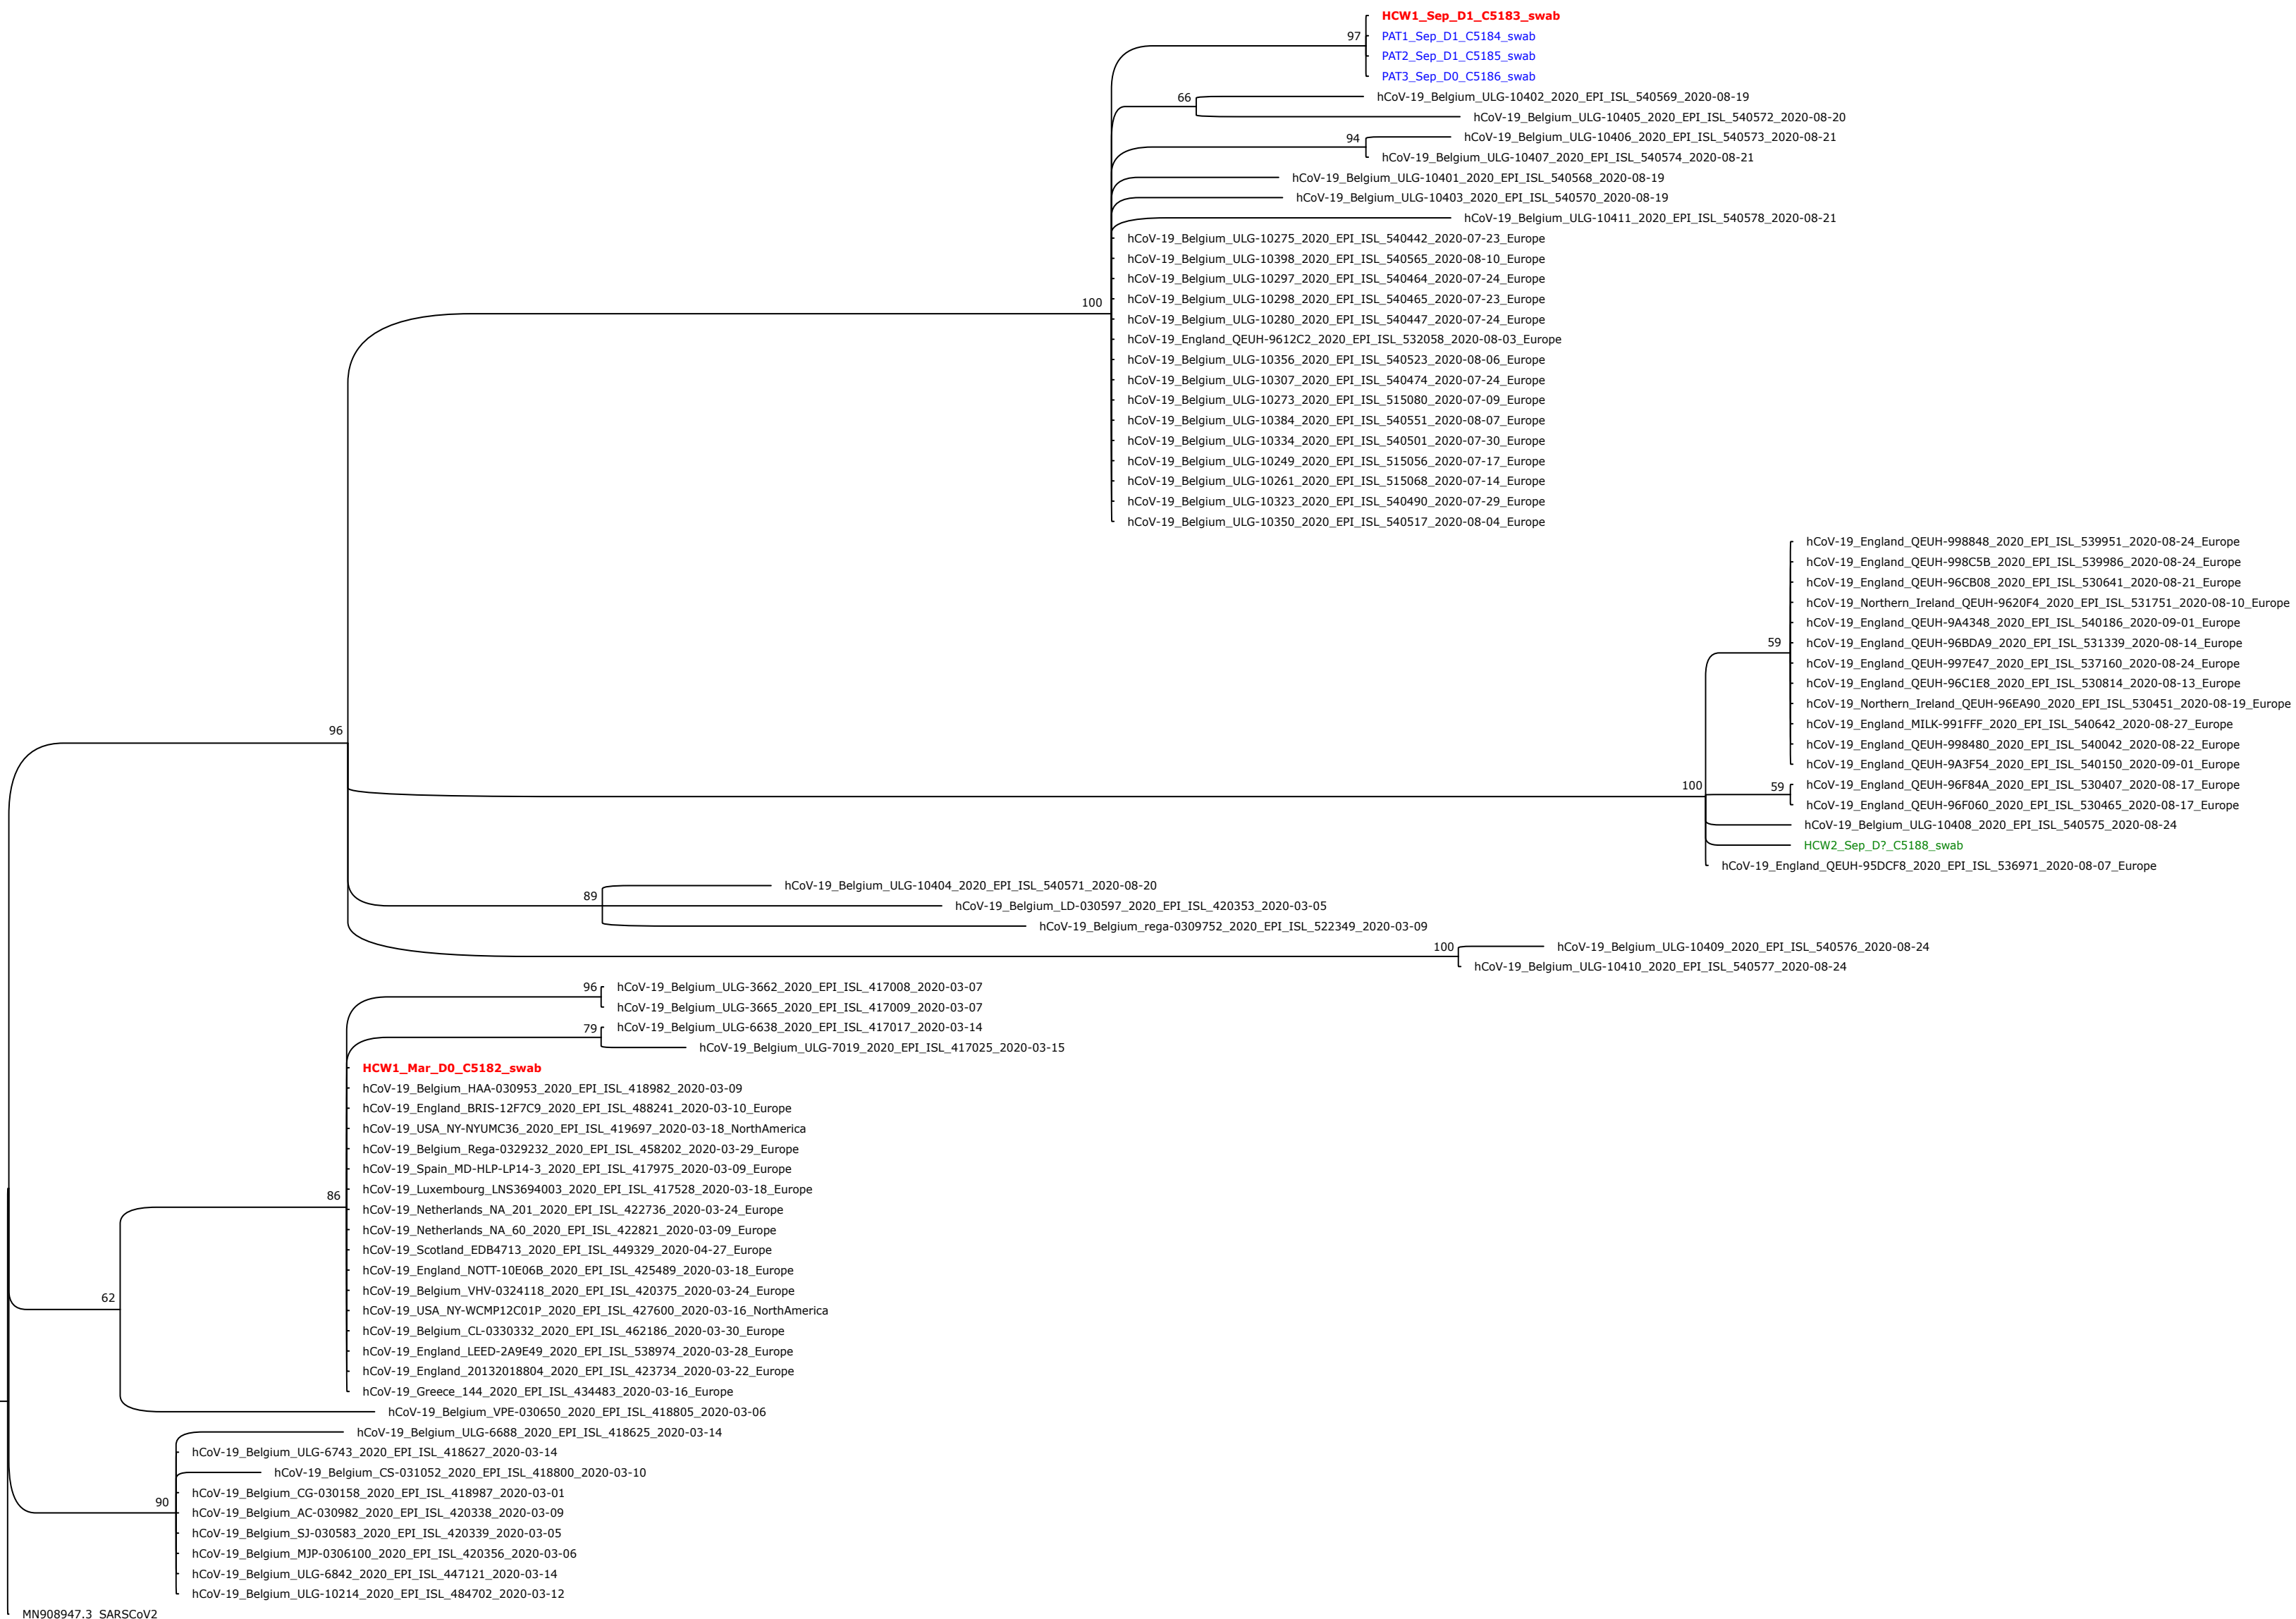

8.0E-5
